# Supplementary material for: Genome-wide systematic characterization of bZIP transcription factors and their expression profiles during seed development and in response to salt stress in peanut
Source: PubMed Central journal article supplement (PMC6335788; doi:10.1186/s12864-019-5434-6), 2019-01-16
Supplement: 12864_2019_5434_MOESM7_ESM.pdf [file 12864_2019_5434_MOESM7_ESM.pdf]

**Additional file 7.** Amino acid sequence alignment of the leucine zipper region of 95 *Arachis* bZIP proteins for prediction of dimerization properties. 95 bZIP proteins are categorized into 28 subfamilies (BZ1-BZ28) with similar predicted dimerization properties. Asparagines at *a* position are colored red. The prolines and glycines are bold to indicated a potential break in the  $\alpha$ -helix. The predicted C-terminal boundary is denoted by the symbol #, other than the natural terminals which are indicated by the symbol \*. The leucine zipper region is divided into heptads (*g, a, b, c, d, e, f*) from L0 to L9 to visualize the potential  $g \leftrightarrow e'$  pairs. Four colors are used to differentiate between different  $g \leftrightarrow e'$  pairs. Attractive basic-acidic pairs (R $\leftrightarrow$ E and K $\leftrightarrow$ E) and colored orange, attractive acidic-basic pairs (E $\leftrightarrow$ R, E $\leftrightarrow$ K, D $\leftrightarrow$ K, and D $\leftrightarrow$ R) are blue, repulsive basic pairs (K $\leftrightarrow$ K, K $\leftrightarrow$ Q, Q $\leftrightarrow$ K, R $\leftrightarrow$ K, and R $\leftrightarrow$ Q) are pink and prepulsive acidic pairs (E $\leftrightarrow$ E and E $\leftrightarrow$ Q) are green. If single amino acid at the positions *e* or *g* is charged, the residue is colored pink for basic amino acid and green for acidic amino acid. If the *a* or *d* position is charged, it is colored brown.

| Subfamily | bZIP No. | Group                              | Leucine zipper region              |                                    |                                    |                                     |                                     |                                     |                                     |                                     |                                       |                                     |
|-----------|----------|------------------------------------|------------------------------------|------------------------------------|------------------------------------|-------------------------------------|-------------------------------------|-------------------------------------|-------------------------------------|-------------------------------------|---------------------------------------|-------------------------------------|
|           |          |                                    | L0                                 | L1                                 | L2                                 | L3                                  | L4                                  | L5                                  | L6                                  | L7                                  | L8                                    | L9                                  |
| BZ1       | AdbZIP48 | A                                  | YTTELEN                            | KVSRLEE                            | ENEKLRK                            | KELENL#                             | LSSA <b>PPP</b>                     | PQPRYQI                             | RRTSSAS                             | F                                   | gabcdef                               | gabcdef                             |
|           | AibZIP43 | A                                  | YTTELEN                            | KVSRLEE                            | ENEKLRK                            | KVRFIF                              | EVLFYFV#                            | SIAP <b>PTS</b>                     | LVP <b>CSYQ</b>                     | VMM <b>MIVR</b>                     | LSTM                                  |                                     |
| BZ2       | AdbZIP29 | A                                  | YTQELEN                            | KVSRLEE                            | ENERLKR                            | QQEIEKV#                            | LPSE <b>PPP</b>                     | EPKRQ <b>LR</b>                     | RTSSG <b>PL</b>                     |                                     |                                       |                                     |
|           | AibZIP23 | A                                  | YTQELEN                            | KVSRLEE                            | ENERLRR                            | QQEIEKV#                            | LPSE <b>PPP</b>                     | EPKRQ <b>LR</b>                     | RTSSG <b>PL</b>                     |                                     |                                       |                                     |
| BZ3       | AdbZIP42 | A                                  | YTFELEA                            | EVQKLKE                            | INKE <b>LQK</b>                    | Q <b>Q</b> EE <b>MM</b> E           | MQKNQ <b>NM#</b>                    | DSS <b>F</b> W <b>PL</b>            | G <b>N</b> KRQ <b>CL</b>            | RRTV <b>TG</b> P                    | W                                     |                                     |
|           | AibZIP35 | A                                  | YTFELEA                            | EVQKLKE                            | INKE <b>LQK</b>                    | Q <b>Q</b> EE <b>MM</b> E           | MQKNQ <b>NM#</b>                    | DSS <b>F</b> W <b>PL</b>            | G <b>N</b> KRQ <b>CL</b>            | RRTV <b>TG</b> P                    | W                                     |                                     |
| BZ4       | AdbZIP33 | A                                  | YTVELEA                            | ELNVLKE                            | ENENL <b>KQ</b>                    | ILDEA <b>EL</b>                     | R <b>R</b> K <b>Q</b> E <b>I</b> S  | Q <b>R</b> K <b>H</b> T <b>T</b> #  | P <b>Q</b> K <b>R</b> T <b>E</b> K  | LREI <b>R</b> R                     | ISAA <b>W</b>                         |                                     |
|           | AibZIP28 | A                                  | YTVELEA                            | ELNVLKE                            | ENENL <b>KQ</b>                    | ILDEA <b>EL</b>                     | R <b>R</b> K <b>Q</b> E <b>I</b> S  | Q <b>R</b> K <b>H</b> T <b>T</b> K  | A <b>Q</b> R <b>K</b> T <b>E</b> K  | LREI <b>R</b> T                     | ISAA <b>W</b> *                       |                                     |
| BZ5       | AibZIP33 | A                                  | YTLELE <b>C</b>                    | LVLQLEA                            | EN <b>T</b> RLLE                   | E <b>Q</b> AQ <b>I</b> K <b>R</b>   | Q <b>R</b> Y <b>N</b> H <b>L</b> L# | H <b>T</b> I <b>I</b> P <b>V</b> I  | H <b>K</b> R <b>K</b> P <b>R</b> P  | M <b>L</b> R <b>R</b> L <b>S</b> N  | L <b>P</b> W                          |                                     |
| BZ6       | AdbZIP39 | A                                  | YQVELES                            | LAVKLEE                            | ENDK <b>L</b> M                    | E <b>K</b> AQ <b>C</b> S <b>H</b>   | H <b>K</b> W <b>V</b> Y <b>S</b> V  | I <b>L</b> I <b>Q</b> S <b>H</b> R  | S <b>L</b> H <b>Y</b> C <b>S</b> I  | T <b>G</b> Y <b>L</b> L <b>L</b> A  | I <b>C</b> C <b>V</b> L <b>N</b> D    | F <b>I</b> G <b>L</b> F <b>V</b> *  |
|           | AibZIP12 | A                                  | YTTDLES                            | NVQQL <b>E</b> I                   | ENAR <b>L</b> L <b>S</b>           | E <b>E</b> I <b>E</b> K <b>A</b> N# | G <b>G</b> L <b>D</b> S <b>D</b>    | V <b>I</b> L <b>A</b> V <b>L</b> D  | F <b>S</b> L <b>K</b> I <b>L</b> A  | H <b>G</b> F <b>V</b> G <b>V</b> G  | I <b>N</b> N <b>T</b> V <b>T</b> Y    |                                     |
|           | AibZIP31 | A                                  | YQVELES                            | LAVKLEE                            | ENDK <b>L</b> M                    | E <b>K</b> L <b>T</b> Q <b>L</b> I  | F <b>M</b> Q <b>L</b> M <b>E</b> K# | V <b>I</b> P <b>V</b> V <b>E</b> K  | R <b>R</b> P <b>R</b> P <b>R</b> L  | R <b>R</b> V <b>R</b> S <b>L</b> Q  | W                                     |                                     |
| BZ7       | AdbZIP2  | A                                  | YTHEL <b>Q</b> Q                   | K <b>V</b> K <b>E</b> L <b>I</b> A | EN <b>N</b> RL <b>R</b> R          | Q <b>N</b> Q <b>Q</b> Q <b>I</b> H  | D*                                  |                                     |                                     |                                     |                                       |                                     |
|           | AibZIP2  | A                                  | YTHEL <b>Q</b> Q                   | K <b>V</b> K <b>E</b> L <b>I</b> A | EN <b>N</b> RL <b>R</b> R          | Q <b>N</b> Q <b>Q</b> Q <b>I</b> V  | E <b>M</b> G <b>S</b> K <b>D</b> #  | P <b>N</b> E <b>K</b> K <b>G</b> K  | N <b>K</b> L <b>R</b> R <b>S</b> G  | S <b>I</b>                          |                                       |                                     |
|           | AdbZIP13 | A                                  | YIEK <b>L</b> E <b>N</b>           | D <b>K</b> S <b>R</b> L <b>L</b> K | S <b>N</b> R <b>R</b> L <b>K</b>   | L <b>M</b> K <b>T</b> *             |                                     |                                     |                                     |                                     |                                       |                                     |
| BZ8       | AdbZIP45 | B                                  | YVEELE <b>E</b>                    | K <b>V</b> R <b>S</b> M <b>H</b> S | T <b>I</b> A <b>D</b> L <b>S</b> S | I <b>S</b> F <b>V</b> M <b>A</b>    | E <b>N</b> A <b>T</b> L <b>R</b> Q  | Q <b>L</b> G <b>V</b> G <b>M</b> #  | C <b>P</b> P <b>P</b> P <b>V</b>    | P <b>G</b> M <b>Y</b> T <b>H</b> A  | P <b>P</b> M <b>A</b> H <b>M</b> P    | Y <b>T</b> W <b>M</b> P <b>C</b>    |
|           | AibZIP40 | B                                  | YVEELE <b>E</b>                    | K <b>V</b> R <b>S</b> M <b>H</b> S | T <b>I</b> A <b>D</b> L <b>S</b> S | I <b>S</b> F <b>V</b> M <b>A</b>    | E <b>N</b> A <b>T</b> L <b>R</b> Q# | Q <b>L</b> G <b>V</b> G <b>M</b>    | C <b>P</b> P <b>P</b> P <b>V</b>    | P <b>G</b> M <b>Y</b> P <b>H</b> A  | P <b>P</b> M <b>A</b> H <b>M</b> P    | Y <b>T</b> W <b>M</b> P <b>C</b>    |
| BZ9       | AdbZIP23 | C                                  | H <b>L</b> T <b>E</b> L <b>E</b> T | Q <b>V</b> S <b>Q</b> L <b>G</b>   | E <b>N</b> S <b>S</b> L <b>L</b> K | L <b>T</b> D <b>I</b> S <b>H</b>    | I <b>Y</b> N <b>D</b> A <b>V</b>    | D <b>N</b> R <b>V</b> L <b>K</b> A  | D <b>V</b> E <b>T</b> L <b>R</b> A  | K <b>V</b> K <b>M</b> A <b>E</b> E  | T <b>V</b> K <b>R</b> I <b>T</b> G#   | L <b>N</b> P <b>M</b> F <b>P</b>    |
|           | AdbZIP37 | C                                  | H <b>L</b> N <b>E</b> L <b>E</b> T | Q <b>V</b> S <b>Q</b> L <b>G</b>   | E <b>N</b> S <b>T</b> L <b>L</b> K | L <b>T</b> D <b>V</b> S <b>H</b>    | I <b>Y</b> N <b>E</b> S <b>A</b> V  | D <b>N</b> R <b>V</b> L <b>K</b> A  | D <b>V</b> E <b>T</b> L <b>R</b> A  | K <b>V</b> K <b>M</b> A <b>E</b> E  | T <b>V</b> K <b>R</b> I <b>T</b> G#   | L <b>N</b> P <b>V</b> M <b>H</b>    |
|           | AibZIP30 | C                                  | H <b>L</b> N <b>E</b> L <b>E</b> T | Q <b>V</b> S <b>Q</b> L <b>G</b>   | E <b>N</b> S <b>T</b> L <b>L</b> K | L <b>T</b> D <b>V</b> S <b>H</b>    | I <b>Y</b> N <b>E</b> S <b>A</b> V  | D <b>N</b> R <b>V</b> L <b>K</b> A  | D <b>V</b> E <b>T</b> L <b>R</b> A  | K <b>V</b> K <b>M</b> A <b>E</b> E  | T <b>V</b> K <b>R</b> I <b>T</b> G#   | L <b>N</b> P <b>V</b> M <b>H</b>    |
|           | AdbZIP30 | C                                  | Y <b>L</b> T <b>D</b> L <b>E</b> S | Q <b>V</b> E <b>Q</b> L <b>L</b>   | E <b>N</b> A <b>T</b> L <b>Y</b> K | Q <b>L</b> T <b>D</b> A <b>S</b> Q  | H <b>F</b> R <b>D</b> A <b>D</b> T  | N <b>N</b> R <b>V</b> L <b>S</b>    | D <b>V</b> E <b>A</b> L <b>R</b> A  | K <b>V</b> K <b>L</b> A <b>E</b> D  | M <b>V</b> A <b>R</b> S <b>S</b> F    | T <b>N</b> L <b>N</b> N <b>Q</b> L* |
|           | AdbZIP44 | C                                  | H <b>L</b> A <b>D</b> L <b>E</b> M | Q <b>V</b> E <b>K</b> L <b>L</b>   | E <b>N</b> A <b>T</b> L <b>Y</b> K | Q <b>F</b> N <b>D</b> V <b>Q</b>    | Q <b>F</b> H <b>E</b> A <b>D</b> T  | N <b>N</b> R <b>V</b> L <b>S</b>    | D <b>V</b> E <b>A</b> L <b>R</b> A  | K <b>V</b> K <b>L</b> A <b>E</b> D  | M <b>V</b> T <b>R</b> G <b>S</b> V    | T <b>T</b> L <b>N</b> N <b>Q</b> L* |
|           | AibZIP39 | C                                  | H <b>L</b> A <b>D</b> L <b>E</b> M | Q <b>V</b> E <b>K</b> L <b>L</b>   | E <b>N</b> A <b>T</b> L <b>Y</b> K | Q <b>F</b> N <b>D</b> V <b>Q</b>    | Q <b>F</b> H <b>E</b> A <b>D</b> T  | N <b>N</b> R <b>V</b> L <b>S</b>    | D <b>V</b> E <b>A</b> L <b>R</b> A  | K <b>V</b> K <b>L</b> A <b>E</b> D  | M <b>V</b> T <b>R</b> G <b>S</b> V    | T <b>T</b> L <b>N</b> N <b>Q</b> L# |
|           | AibZIP24 | C                                  | Y <b>L</b> T <b>D</b> L <b>E</b> S | Q <b>V</b> E <b>Q</b> L <b>L</b>   | E <b>N</b> A <b>T</b> L <b>Y</b> K | Q <b>L</b> T <b>D</b> A <b>S</b> Q  | H <b>F</b> R <b>D</b> A <b>D</b> T  | N <b>N</b> R <b>V</b> L <b>S</b>    | D <b>V</b> E <b>A</b> L <b>R</b> A  | K <b>V</b> K <b>L</b> A <b>E</b> D  | M <b>V</b> A <b>R</b> S <b>S</b> F    | T <b>N</b> L <b>N</b> N <b>Q</b> L# |
| BZ10      | AdbZIP17 | G                                  | E <b>C</b> D <b>E</b> L <b>A</b> Q | R <b>A</b> E <b>A</b> L <b>E</b>   | E <b>N</b> A <b>S</b> L <b>R</b> S | E <b>V</b> S <b>R</b> I <b>R</b> S  | E <b>Y</b> E <b>Q</b> L <b>A</b> S  | E <b>N</b> A <b>A</b> L <b>K</b> E# | R <b>L</b> G <b>E</b> L <b>P</b> G  | T <b>D</b> D <b>L</b> R <b>S</b> R  | T <b>M</b> N <b>D</b> Q <b>P</b> A    | A <b>D</b> D <b>P</b> Q <b>S</b>    |
|           | AibZIP15 | G                                  | E <b>C</b> D <b>E</b> L <b>A</b> Q | R <b>A</b> E <b>A</b> L <b>E</b>   | E <b>N</b> A <b>S</b> L <b>R</b> S | E <b>V</b> S <b>R</b> I <b>R</b> S  | E <b>Y</b> E <b>Q</b> L <b>A</b> S  | E <b>N</b> A <b>A</b> L <b>K</b> E# | R <b>L</b> G <b>E</b> L <b>P</b> G  | N <b>D</b> D <b>L</b> R <b>S</b> R  | T <b>M</b> N <b>D</b> Q <b>P</b> A    | A <b>D</b> D <b>P</b> Q <b>S</b>    |
| BZ11      | AdbZIP6  | G                                  | E <b>A</b> E <b>E</b> L <b>A</b> R | K <b>V</b> E <b>N</b> L <b>T</b> A | E <b>N</b> V <b>S</b> L <b>K</b> S | E <b>I</b> N <b>Q</b> L <b>S</b> E  | S <b>S</b> E <b>K</b> L <b>V</b>    | E <b>N</b> T <b>L</b> R <b>E</b>    | K <b>L</b> K <b>N</b> A <b>Q</b> L# | G <b>P</b> A <b>E</b> I <b>V</b>    | L <b>N</b> N <b>T</b> D <b>S</b> N    | R <b>A</b> T <b>P</b> V <b>S</b> T  |
|           | AibZIP6  | G                                  | E <b>A</b> E <b>E</b> L <b>A</b> R | K <b>V</b> E <b>N</b> L <b>T</b> A | E <b>N</b> V <b>S</b> L <b>K</b> S | E <b>I</b> N <b>Q</b> L <b>S</b> D  | S <b>S</b> E <b>K</b> L <b>V</b>    | E <b>N</b> T <b>L</b> R <b>E</b>    | K <b>L</b> K <b>N</b> A <b>Q</b> L# | G <b>P</b> A <b>E</b> I <b>V</b>    | L <b>N</b> N <b>T</b> D <b>S</b> N    | R <b>A</b> T <b>P</b> V <b>S</b> T  |
|           | AdbZIP19 | G                                  | E <b>C</b> E <b>E</b> L <b>Q</b> K | K <b>V</b> E <b>S</b> L <b>G</b> N | E <b>N</b> R <b>T</b> L <b>R</b> E | E <b>L</b> Q <b>R</b> V <b>S</b> E  | E <b>C</b> E <b>K</b> L <b>T</b> A  | E <b>N</b> S <b>I</b> K <b>E</b>    | E <b>L</b> E <b>R</b> L <b>C</b> G# | P <b>E</b> A <b>V</b> A <b>S</b> L  | E                                     |                                     |
|           | AdbZIP4  | G                                  | E <b>T</b> E <b>E</b> L <b>A</b> R | K <b>V</b> E <b>S</b> L <b>S</b> A | E <b>N</b> V <b>L</b> L <b>K</b> S | E <b>I</b> N <b>R</b> L <b>A</b> E  | S <b>S</b> G <b>K</b> M <b>V</b>    | E <b>N</b> A <b>T</b> L <b>G</b> E  | K <b>L</b> K <b>I</b> V <b>M</b>    | V <b>Q</b> T <b>E</b> G <b>I</b> I  | L <b>K</b> G <b>I</b> E <b>S</b> K#   | S <b>A</b> T <b>P</b> K <b>S</b> T  |
|           | AibZIP4  | G                                  | E <b>T</b> E <b>E</b> L <b>A</b> R | K <b>V</b> E <b>S</b> L <b>S</b> A | E <b>N</b> V <b>L</b> L <b>K</b> S | E <b>I</b> N <b>R</b> L <b>T</b> E  | S <b>S</b> E <b>K</b> M <b>V</b>    | E <b>N</b> A <b>T</b> L <b>G</b> E  | K <b>L</b> K <b>N</b> A <b>M</b>    | V <b>Q</b> T <b>E</b> G <b>I</b> I  | L <b>K</b> G <b>I</b> E <b>S</b> K#   | S <b>A</b> T <b>P</b> M <b>S</b> T  |
| BZ12      | AdbZIP41 | H                                  | Y <b>L</b> I <b>D</b> L <b>E</b> T | R <b>V</b> K <b>D</b> L <b>E</b> K | K <b>S</b> E <b>L</b> K <b>E</b>   | R <b>L</b> S <b>T</b> L <b>Q</b> N  | E <b>N</b> Q <b>M</b> L <b>R</b> Q  | I <b>L</b> K <b>N</b> T <b>T</b> A  | S <b>R</b> R <b>G</b> S <b>N</b> S  | G <b>T</b> N <b>A</b> E*            |                                       |                                     |
|           | AdbZIP47 | H                                  | Y <b>L</b> I <b>D</b> L <b>E</b> T | R <b>V</b> K <b>D</b> L <b>E</b> K | K <b>S</b> E <b>L</b> K <b>E</b>   | R <b>L</b> S <b>T</b> L <b>Q</b> N  | E <b>N</b> Q <b>M</b> L <b>R</b> Q  | I <b>L</b> K <b>N</b> T <b>T</b> A  | S <b>R</b> R <b>G</b> S <b>N</b> S  | G <b>T</b> N <b>A</b> E*            |                                       |                                     |
|           | AdbZIP14 | H                                  | Y <b>V</b> N <b>D</b> L <b>E</b> S | R <b>A</b> K <b>D</b> L <b>E</b> D | K <b>S</b> N <b>L</b> E <b>E</b>   | I <b>S</b> T <b>L</b> I <b>N</b>    | E <b>N</b> T <b>L</b> R <b>K</b>    | V <b>T</b> D*                       |                                     |                                     |                                       |                                     |
|           | AibZIP36 | H                                  | Y <b>L</b> I <b>D</b> L <b>E</b> T | R <b>V</b> K <b>D</b> L <b>E</b> K | K <b>S</b> E <b>L</b> K <b>E</b>   | R <b>L</b> S <b>T</b> L <b>Q</b> N  | E <b>N</b> Q <b>M</b> L <b>R</b> Q  | I <b>L</b> K <b>N</b> T <b>T</b> A  | S <b>R</b> R <b>G</b> S <b>N</b> S  | G <b>T</b> N <b>A</b> E*            |                                       |                                     |
| AibZIP42  | H        | Y <b>L</b> I <b>D</b> L <b>E</b> T | R <b>V</b> K <b>D</b> L <b>E</b> K | K <b>S</b> E <b>L</b> K <b>E</b>   | R <b>L</b> S <b>T</b> L <b>Q</b> N | E <b>N</b> Q <b>M</b> L <b>R</b> Q  | I <b>L</b> K <b>N</b> T <b>T</b> A  | S <b>R</b> R <b>G</b> S <b>N</b> S  | G <b>T</b> N <b>A</b> E*            |                                     |                                       |                                     |
| BZ13      | AdbZIP27 | I                                  | Y <b>I</b> S <b>E</b> L <b>H</b>   | K <b>V</b> Q <b>T</b> L <b>Q</b> A | E <b>T</b> T <b>S</b> L <b>S</b> T | Q <b>F</b> T <b>K</b> L <b>M</b>    | D <b>N</b> S <b>E</b> L <b>S</b> K  | L <b>N</b> N <b>E</b> Y <b>L</b>    | K <b>L</b> Q <b>A</b> L <b>E</b> Q  | Q <b>S</b> Q <b>L</b> K <b>D</b> A  | L <b>N</b> E <b>L</b> T <b>D</b> A    | E <b>V</b> R <b>R</b> L <b>R</b> R* |
|           | AibZIP19 | I                                  | Y <b>I</b> S <b>E</b> L <b>H</b>   | K <b>V</b> Q <b>T</b> L <b>Q</b> A | E <b>T</b> T <b>S</b> L <b>S</b> T | Q <b>F</b> T <b>K</b> L <b>M</b>    | D <b>N</b> S <b>E</b> L <b>S</b> K  | L <b>N</b> N <b>E</b> Y <b>L</b>    | K <b>L</b> Q <b>A</b> L <b>E</b> Q  | Q <b>S</b> Q <b>L</b> K <b>D</b> A  | L <b>N</b> E <b>L</b> T <b>D</b> A    | E <b>V</b> R <b>R</b> L <b>R</b> R* |
| BZ14      | AdbZIP43 | I                                  | Y <b>V</b> V <b>E</b> L <b>R</b>   | K <b>I</b> Q <b>V</b> L <b>T</b>   | E <b>A</b> T <b>T</b> L <b>S</b> A | Q <b>L</b> N <b>L</b> F <b>Q</b> R  | D <b>T</b> T <b>G</b> L <b>T</b> T  | E <b>N</b> T <b>E</b> L <b>R</b> L  | R <b>L</b> Q <b>A</b> M <b>E</b> Q  | Q <b>A</b> K <b>L</b> C <b>D</b> A  | L <b>N</b> E <b>A</b> L <b>K</b>      | E <b>V</b> D <b>R</b> L <b>K</b> I* |
|           | AdbZIP1  | I                                  | Y <b>I</b> Q <b>E</b> L <b>R</b>   | K <b>V</b> Q <b>T</b> L <b>T</b>   | E <b>A</b> T <b>T</b> L <b>S</b> A | Q <b>L</b> T <b>L</b> Y <b>Q</b> R  | D <b>T</b> T <b>G</b> L <b>S</b> S  | E <b>N</b> T <b>E</b> L <b>K</b> L  | R <b>L</b> Q <b>A</b> M <b>E</b> Q  | Q <b>A</b> Q <b>L</b> R <b>D</b> A  | L <b>N</b> D <b>A</b> L <b>M</b> K    | E <b>V</b> E <b>R</b> L <b>K</b> I* |
|           | AdbZIP32 | I                                  | Y <b>I</b> Q <b>E</b> L <b>R</b>   | K <b>V</b> Q <b>T</b> L <b>T</b>   | E <b>A</b> T <b>T</b> L <b>S</b> A | Q <b>L</b> T <b>L</b> Y <b>Q</b> R  | D <b>T</b> N <b>G</b> L <b>S</b> T  | E <b>N</b> T <b>E</b> L <b>K</b> L  | R <b>L</b> Q <b>A</b> M <b>E</b> Q  | Q <b>A</b> Q <b>L</b> R <b>D</b> A  | L <b>N</b> E <b>A</b> L <b>K</b>      | E <b>V</b> E <b>R</b> L <b>K</b> V* |
|           | AibZIP3  | I                                  | Y <b>I</b> Q <b>E</b> L <b>R</b>   | K <b>V</b> Q <b>T</b> L <b>T</b>   | E <b>A</b> T <b>T</b> L <b>S</b> A | Q <b>L</b> T <b>L</b> Y <b>Q</b> R  | D <b>T</b> T <b>G</b> L <b>S</b> S  | E <b>N</b> T <b>E</b> L <b>K</b> L  | R <b>L</b> Q <b>A</b> M <b>E</b> Q  | Q <b>A</b> Q <b>L</b> R <b>D</b> A  | L <b>N</b> D <b>A</b> L <b>M</b> K    | E <b>V</b> E <b>R</b> L <b>K</b> I* |
|           | AibZIP37 | I                                  | Y <b>V</b> V <b>E</b> L <b>R</b>   | K <b>I</b> Q <b>V</b> L <b>T</b>   | E <b>A</b> T <b>T</b> L <b>S</b> A | Q <b>L</b> N <b>L</b> F <b>Q</b> R  | D <b>T</b> T <b>G</b> L <b>T</b> T  | E <b>N</b> T <b>E</b> L <b>R</b> L  | R <b>L</b> Q <b>A</b> M <b>E</b> Q  | Q <b>A</b> K <b>L</b> C <b>D</b> A  | L <b>N</b> E <b>A</b> L <b>K</b>      | E <b>V</b> D <b>R</b> L <b>K</b> I* |
| BZ15      | AdbZIP11 | I                                  | Y <b>I</b> S <b>E</b> L <b>H</b>   | K <b>V</b> Q <b>T</b> L <b>T</b>   | E <b>A</b> T <b>T</b> L <b>S</b> A | Q <b>L</b> T <b>L</b> L <b>Q</b> R  | D <b>S</b> V <b>G</b> L <b>T</b> N  | Q <b>N</b> S <b>E</b> L <b>F</b>    | R <b>L</b> Q <b>S</b> M <b>E</b> Q  | Q <b>A</b> K <b>L</b> R <b>D</b> A  | L <b>N</b> E <b>A</b> L <b>T</b> A    | E <b>V</b> Q <b>R</b> L <b>K</b> L* |
|           | AibZIP11 | I                                  | Y <b>I</b> S <b>E</b> L <b>H</b>   | K <b>V</b> Q <b>T</b> L <b>T</b>   | E <b>A</b> T <b>T</b> L <b>S</b> A | Q <b>L</b> T <b>L</b> L <b>Q</b> R  | D <b>S</b> V <b>G</b> L <b>T</b> N  | Q <b>N</b> S <b>E</b> L <b>F</b>    | R <b>L</b> Q <b>S</b> M <b>E</b> Q  | Q <b>A</b> K <b>L</b> R <b>D</b> A  | L <b>N</b> E <b>A</b> L <b>T</b> A    | E <b>V</b> Q <b>R</b> L <b>K</b> L* |
| BZ16      | AibZIP26 | I                                  | Y <b>I</b> Q <b>E</b> L <b>R</b>   | K <b>V</b> Q <b>T</b> L <b>O</b> I | E <b>A</b> T <b>T</b> L <b>S</b> A | Q <b>L</b> T <b>L</b> Y <b>Q</b> V  | R <b>A</b> V <b>H</b> L <b>K</b> L  | LA*                                 |                                     |                                     |                                       |                                     |
|           | AdbZIP22 | I                                  | Y <b>I</b> Q <b>E</b> L <b>R</b>   | K <b>V</b> Q <b>T</b> F <b>T</b>   | E <b>A</b> T <b>T</b> L <b>S</b> V | Q <b>L</b> T <b>L</b> H <b>Q</b> V# | R <b>A</b> V <b>H</b> L <b>K</b> P  | LA                                  |                                     |                                     |                                       |                                     |
|           | AibZIP32 | I                                  | Y <b>I</b> Q <b>E</b> L <b>R</b>   | K <b>V</b> Q <b>T</b> L <b>T</b>   | E <b>A</b> T <b>T</b> L <b>S</b> A | Q <b>L</b> T <b>L</b> Y <b>Q</b> V# | R <b>A</b> V <b>H</b> L <b>K</b> P  | LA                                  |                                     |                                     |                                       |                                     |
| BZ17      | AdbZIP49 | G                                  | E <b>C</b> E <b>E</b> L <b>R</b> G | N <b>M</b> D <b>N</b> L <b>D</b>   | E <b>N</b> S <b>S</b> L <b>T</b> H | M <b>L</b> I <b>R</b> L <b>S</b> E  | E <b>C</b> M <b>D</b> L <b>S</b> N  | E <b>N</b> D <b>S</b> T <b>Q</b> L# | A <b>F</b> Y <b>V</b> L <b>N</b> P  | A <b>L</b> I <b>A</b> D <b>N</b> L  | A <b>S</b> T <b>I</b> T <b>Y</b> N    | S <b>M</b> V <b>K</b> L <b>W</b> F  |
|           | AibZIP45 | G                                  | E <b>C</b> E <b>E</b> L <b>R</b> G | N <b>M</b> D <b>N</b> L <b>D</b>   | E <b>N</b> S <b>S</b> L <b>T</b> H | M <b>L</b> I <b>R</b> L <b>S</b> E  | E <b>C</b> M <b>D</b> L <b>S</b> N  | E <b>N</b> D <b>S</b> T <b>Q</b> L# | A <b>F</b> Y <b>V</b> L <b>N</b> P  | A <b>L</b> I <b>A</b> D <b>N</b> L  | A <b>S</b> T <b>I</b> T <b>Y</b> N    | S <b>M</b> V <b>R</b> M <b>W</b> F  |
| BZ18      | AdbZIP50 | G                                  | E <b>C</b> E <b>E</b> L <b>Q</b> R | K <b>V</b> E <b>S</b> L <b>G</b> N | E <b>S</b> Q <b>T</b> L <b>R</b> E | E <b>L</b> Q <b>I</b> V <b>L</b> E  | E <b>C</b> K <b>K</b> L <b>T</b> A  | E <b>N</b> S <b>S</b> T <b>K</b> I  | M <b>S</b> S <b>N</b> T <b>F</b>    | A <b>V</b> N <b>S</b> Q <b>Q</b> E  | E <b>L</b> E <b>R</b> L <b>C</b> G#   | P <b>E</b> A <b>I</b> A <b>S</b> L  |
|           | AdbZIP7  | G                                  | E <b>C</b> E <b>E</b> L <b>Q</b> R | K <b>V</b> E <b>S</b> L <b>G</b> N | E <b>S</b> Q <b>T</b> L <b>R</b> E | E <b>L</b> Q <b>I</b> V <b>L</b> E  | E <b>C</b> K <b>K</b> L <b>T</b> A  | E <b>N</b> S <b>S</b> T <b>K</b> I  | M <b>S</b> S <b>N</b> T <b>F</b>    | A <b>V</b> N <b>S</b> Q <b>Q</b> E  | E <b>L</b> E <b>R</b> L <b>C</b> G#   | P <b>E</b> A <b>I</b> A <b>S</b> L  |
|           | AdbZIP15 | G                                  | E <b>C</b> E <b>E</b> L <b>Q</b> R | K <b>V</b> E <b>S</b> L <b>G</b> N | E <b>S</b> Q <b>T</b> L <b>R</b> E | E <b>L</b> Q <b>I</b> V <b>L</b> E  | E <b>C</b> K <b>K</b> L <b>T</b> A  | E <b>N</b> S <b>S</b> T <b>K</b> I  | M <b>S</b> S <b>N</b> T <b>F</b>    | A <b>V</b> N <b>S</b> Q <b>Q</b> E  | E <b>L</b> E <b>R</b> L <b>C</b> G#   | P <b>E</b> A <b>V</b> A <b>S</b> L  |
| BZ19      | AibZIP38 | G                                  | E <b>C</b> E <b>D</b> L <b>Q</b> K | K <b>V</b> E <b>L</b> G <b>N</b> E | S <b>Q</b> T <b>L</b> R <b>E</b> E | L <b>Q</b> R <b>V</b> L <b>E</b> E  | C <b>E</b> K <b>L</b> T <b>A</b> E  | N <b>S</b> S <b>I</b> K <b>I</b> M  | S <b>S</b> N <b>T</b> F <b>A</b>    | V <b>N</b> S <b>Q</b> Q <b>E</b> K# | L <b>E</b> R <b>L</b> C <b>G</b> P    | E <b>A</b> V <b>A</b> N <b>L</b>    |
|           | AibZIP21 | G                                  | E <b>C</b> E <b>D</b> L <b>Q</b> K | K <b>V</b> E <b>L</b> G <b>N</b> E | S <b>Q</b> T <b>L</b> R <b>E</b> E | L <b>Q</b> R <b>V</b> S <b>E</b> E  | C <b>E</b> K <b>L</b> T <b>A</b> E  | N <b>S</b> S <b>I</b> K <b>I</b> M  | S <b>S</b> N <b>T</b> F <b>A</b>    | V <b>N</b> S <b>Q</b> Q <b>E</b> K# | L <b>E</b> R <b>L</b> C <b>G</b> P    | E <b>A</b> V <b>A</b> S <b>L</b>    |
| BZ20      | AibZIP22 | U                                  | L <b>C</b> E <b>D</b> L <b>T</b> R | K <b>A</b> S <b>N</b> L <b>V</b> L | E <b>N</b> E <b>N</b> L <b>K</b> K | E <b>K</b> E <b>M</b> A <b>L</b> K  | E <b>Y</b> Q <b>S</b> L <b>E</b> T  | T <b>N</b> K <b>H</b> L <b>A</b>    | Q <b>I</b> A <b>K</b> T <b>I</b> N# | S <b>E</b> V <b>D</b> K <b>A</b> P  | V <b>E</b> Q <b>E</b> S <b>S&lt;/</b> |                                     |
